# Supplementary material
Source: publisher figshare collection journal article supplement (https://acs.figshare.com/ndownloader/files/5799699)
Supplement: Supplementary file 1 [file 5799699]

#### Terms & Conditions

Electronic Supporting Information files are available without a subscription to ACS Web Editions. The American Chemical Society holds a copyright ownership interest in any copyrightable Supporting Information. Files available from the ACS website may be downloaded for personal use only. Users are not otherwise permitted to reproduce, republish, redistribute, or sell any Supporting Information from the ACS website, either in whole or in part, in either machine-readable form or any other form without permission from the American Chemical Society. For permission to reproduce, republish and redistribute this material, requesters must process their own requests via the RightsLink permission system. Information about how to use the RightsLink permission system can be found at <http://pubs.acs.org/page/copyright/permissions.html>

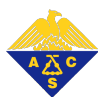

ACS Publications

MOST TRUSTED. MOST CITED. MOST READ.

# Suppring Infomation 1

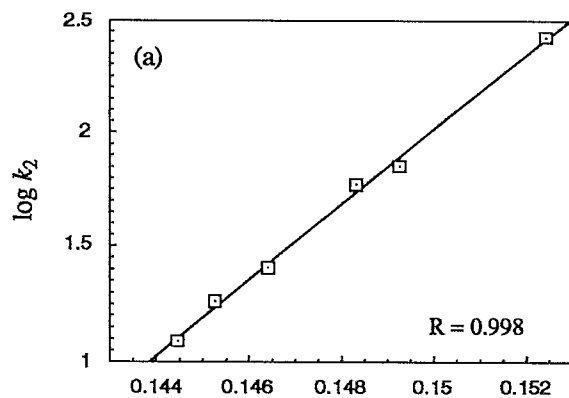

$$\frac{(1-d)(|C_{SL1}| + |C_{SL2}|)^2 + 2d}{|E_{RH} - E_{SL}|} \quad (d = 0.58)$$

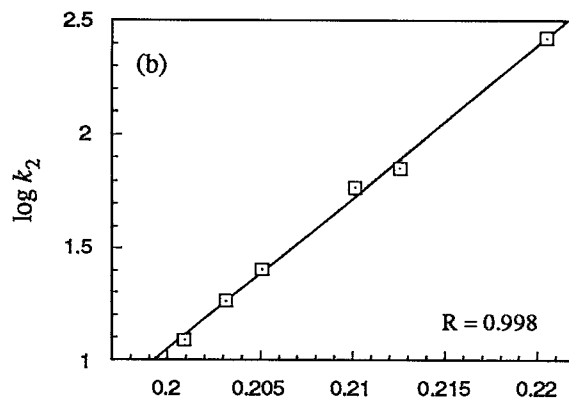

$$\frac{(1-d)(|C_{SL1}| + |C_{SL2}|)^2 + 2d}{|E_{RH} - E_{SL}|} \quad (d = 0.40)$$

**Figure 13.** Plots of  $\log k_2$  vs.  $[(1-d)(|C_{SL1}| + |C_{SL2}|)^2 + 2d]/|E_{RH} - E_{SL}|$  for the reactions of  $MnO_4^-$  with *trans*-chalcones, (a)  $E_{RH} = -10.5$  eV,  $d = 0.58$ ; (b)  $E_{RH} = -6.5$  eV,  $d = 0.40$ .

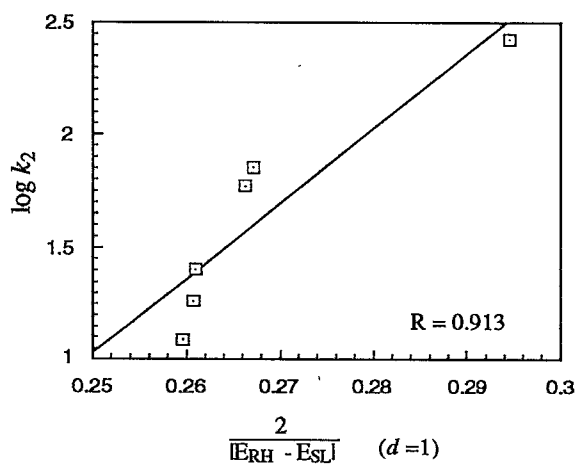

**Figure 14.** Plots of  $\log k_2$  vs.  $[(1-d)(|C_{SL1}| + |C_{SL2}|)^2 + 2d]/|E_{RH} - E_{SL}|$  for the reactions of  $MnO_4^-$  with *trans*-chalcones,  $E_{RH} = -8.5$  eV,  $d = 1$ .

## Supporting Information 2

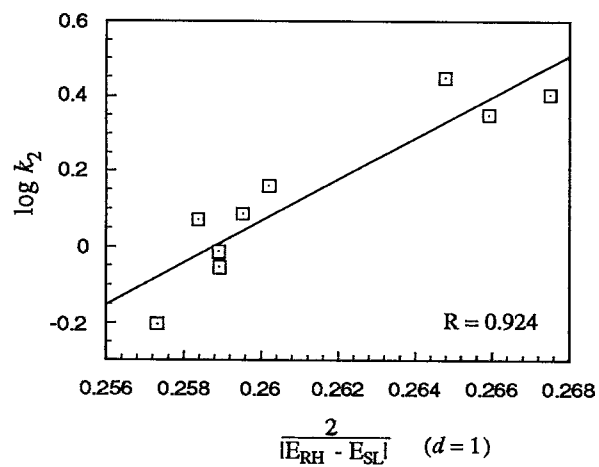

**Figure 15.** Plots of  $\log k_2$  vs.  $[(1-d)(|C_{SL1}| + |C_{SL2}|)^2 + 2d]/|E_{RH} - E_{SL}|$  for the reactions of  $MnO_4^-$  with methyl cinnamates,  $d = 1$  (rate data from ref. 3 and 35).

### Supporting Information 3

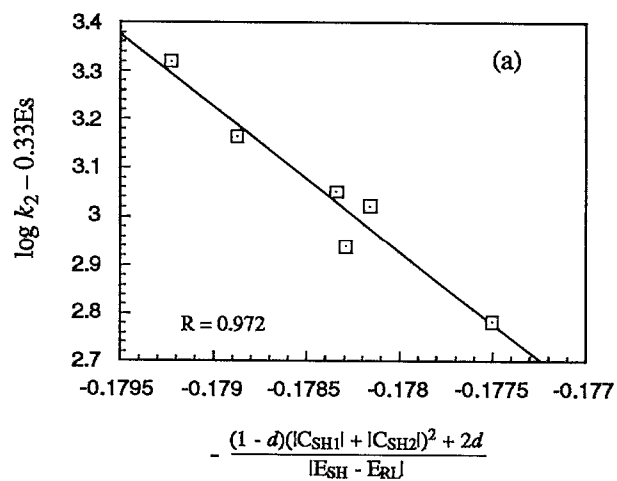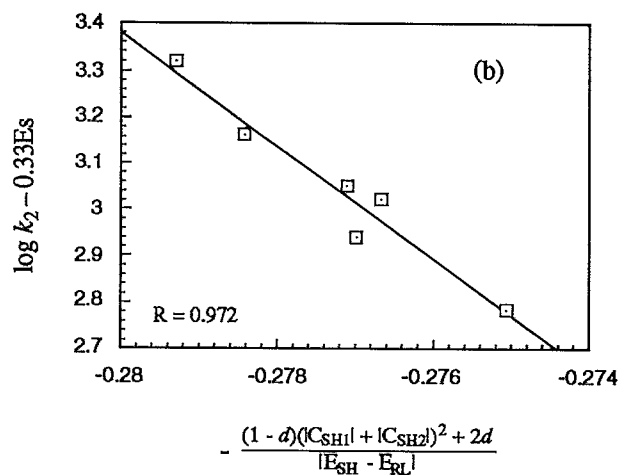

**Figure 16.** Plots of  $\log k_2 - 0.33E_s$  vs.  $-\frac{[(1-d)(|C_{SH1}| + |C_{SH2}|)^2 + 2d]}{|E_{SH} - E_{RL}|}$  for the reactions of  $MnO_4^-$  with alkyl vinyl ethers, (a)  $E_{RH} = 1.5$  eV,  $d = 0.93$ ; (b)  $E_{RL} = -2.5$  eV,  $d = 0.89$  (rate data from ref. 4).

## Suppring Infomation 4

*Analyses of Diels-Alder reactions:* First, the reactions between 9,10-dimethylantracene and a set of seven nonaromatic *trans*-1,2-disubstituted ethylenes<sup>38,39</sup> were tested as an example of the reaction between a symmetrical diene and unsymmetrical dienophiles. The rate data of these reactions have been successfully correlated by Charton with the extended form of Hammett equation (Figure 17).<sup>39</sup> The reactions were analyzed by use of eq 7 assuming the reaction model in Figure 1 where R is a diene and S is a dienophile. As shown in Figure 18, the plot of  $\log k_2$  against  $[(1-d)(|C_{SL1}| + |C_{SL2}|)^2 + 2d]/|E_{RH} - E_{SL}|$  reproduced the extended Hammett plot with excellent fidelity when  $d$  was taken as 0.80.

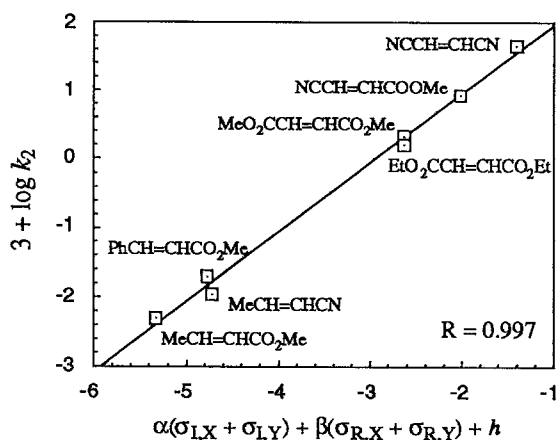

**Figure 17.** Plot by the extended Hammett equation for the reactions of 9,10-dimethylantracene with *trans*-1,2-disubstituted ethylenes (XCH=CHY);  $\alpha = 3.31$ ,  $\beta = 6.14$ ,  $h = -6.23$  (from ref. 39).

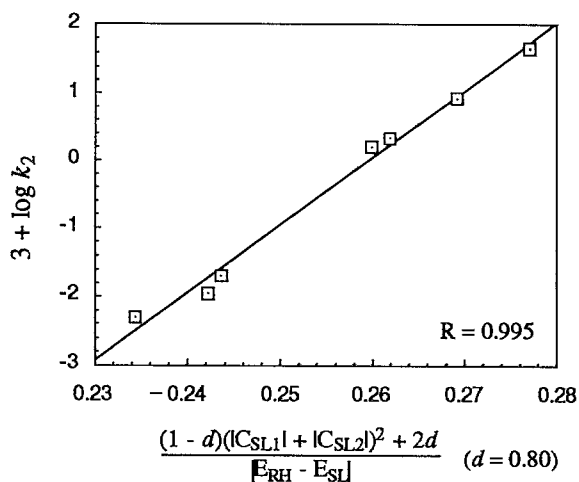

**Figure 18.** Plots of  $\log k_2$  vs.  $[(1-d)(|C_{SL1}| + |C_{SL2}|)^2 + 2d]/|E_{RH} - E_{SL}|$  for the reactions of 9,10-dimethylantracene with *trans*-1,2-disubstituted ethylenes;  $d = 0.80$  (Data from ref. 38 and 39).

As an example of the Diels-Alder reaction between a symmetrical dienophile and a series of dienes, we next analyzed the reactions of maleic anhydride with anthracene and its benzo derivatives studied by Dewar and Pyron.<sup>40</sup> It was suggested by them that the reaction involves a cyclic transition state because a linear relationship was found between  $\log k_2$  and paraloocalization energies but not between  $\log k_2$  and localization energies. If one takes the dienophile as R, and anthracene and its benzo derivatives as S in Figure 1, eq 8 can apply to this case, though these are the reactions with normal electron demand. A plot of  $\log k_2$  against  $[(1-d)(|C_{SH1}| + |C_{SH2}|)^2 + 2d]/|E_{SH} - E_{RL}|$  is obtained with the best correlation to a straight line when  $d$  is taken as 0.76 and this is very similar to the mirror image of the plot given by Dewar and Pyron (Figure 19).

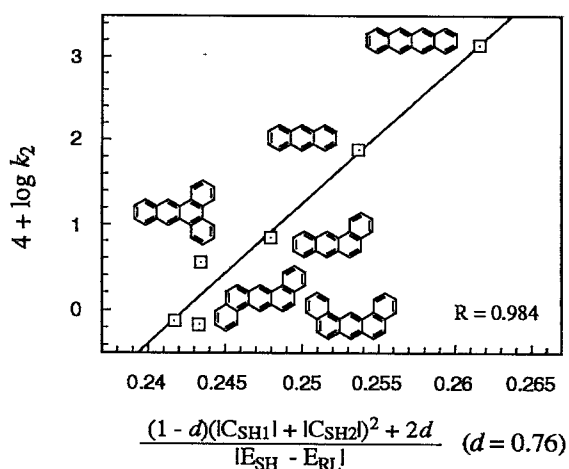

**Figure 19.** Plot of  $\log k_2$  vs.  $-[(1-d)(|C_{SH1}| + |C_{SH2}|)^2 + 2d]/|E_{SH} - E_{RL}|$  for the reactions of maleic anhydride with anthracene and its benzo derivatives;  $d = 0.76$  (rate data from ref. 40).

## References

- (38) Sauer, J.; Wiest, H.; Mielert, A. *Chem. Ber.* **1964**, *97*, 3183.
- (39) Charton, M. *J. Org. Chem.* **1966**, *31*, 3745.
- (40) Dewar, M.J..S.; Pyron, R.S. *J. Am. Chem. Soc.* **1970**, *92*, 3098.
